# Supplementary material
Source: PubMed Central journal article supplement (PMC10916945)
Supplement: ALZ-20-1268-s001.pdf [file ALZ-20-1268-s001.pdf]

\*First name, last name, and suffix (if applicable) are required and will appear in PubMed.

| <b>*Group Name(s): the Alzheimer's Disease Genetics Consortium (ADCG), the Alzheimer's Disease Neuroimaging Initiative (ADNI), the Alzheimer's Disease Sequencing Project (ADSP)</b> |                   |                              |                         |                                                        |                                                 |                                                                |                                                                                                   |
|--------------------------------------------------------------------------------------------------------------------------------------------------------------------------------------|-------------------|------------------------------|-------------------------|--------------------------------------------------------|-------------------------------------------------|----------------------------------------------------------------|---------------------------------------------------------------------------------------------------|
| <b>*First Name and Middle Initial(s)</b>                                                                                                                                             | <b>*Last Name</b> | <b>*Suffix (eg, Jr, III)</b> | <b>Academic Degrees</b> | <b>Institution</b>                                     | <b>Location (city, state/province, country)</b> | <b>Role or Contribution, eg, chair, principal investigator</b> | <b>Group (if more than 1 Group listed in the byline) and/or Subgroup (eg, Steering Committee)</b> |
| Erin                                                                                                                                                                                 | Abner             |                              | PhD                     | University of Kentucky                                 |                                                 |                                                                | Alzheimer's Disease Genetics Consortium                                                           |
| Perrie                                                                                                                                                                               | Adams             |                              | PhD                     | University of Texas Southwestern Medical Center        |                                                 |                                                                | Alzheimer's Disease Genetics Consortium                                                           |
| Alyssa                                                                                                                                                                               | Aguirre           |                              | LCSW                    | University of Texas at Austin/Dell Medical School      |                                                 |                                                                | Alzheimer's Disease Genetics Consortium                                                           |
| Marilyn                                                                                                                                                                              | Albert            |                              | PhD                     | Johns Hopkins University                               |                                                 |                                                                | Alzheimer's Disease Genetics Consortium                                                           |
| Roger                                                                                                                                                                                | Albin             |                              | MD                      | University of Michigan                                 |                                                 |                                                                | Alzheimer's Disease Genetics Consortium                                                           |
| Mariet                                                                                                                                                                               | Allen             |                              | PhD                     | Mayo Clinic                                            |                                                 |                                                                | Alzheimer's Disease Genetics Consortium                                                           |
| Lisa                                                                                                                                                                                 | Alvarez           |                              |                         | University of North Texas Health Science Center        |                                                 |                                                                | Alzheimer's Disease Genetics Consortium                                                           |
| Liana                                                                                                                                                                                | Apostolova        |                              | MD                      | Indiana University                                     |                                                 |                                                                | Alzheimer's Disease Genetics Consortium                                                           |
| Steven                                                                                                                                                                               | Arnold            |                              | MD                      | University of Pennsylvania Perelman School of Medicine |                                                 |                                                                | Alzheimer's Disease Genetics Consortium                                                           |
| Sanjay                                                                                                                                                                               | Asthana           |                              | MD                      | University of Wisconsin                                |                                                 |                                                                | Alzheimer's Disease Genetics Consortium                                                           |
| Craig                                                                                                                                                                                | Atwood            |                              | PhD                     | University of Wisconsin                                |                                                 |                                                                | Alzheimer's Disease Genetics Consortium                                                           |
| Gayle                                                                                                                                                                                | Ayres             |                              | DO                      | University of Texas at Austin/Dell Medical School      |                                                 |                                                                | Alzheimer's Disease Genetics Consortium                                                           |
| Robert                                                                                                                                                                               | Barber            |                              | PhD                     | University of North Texas Health Science Center        |                                                 |                                                                | Alzheimer's Disease Genetics Consortium                                                           |
| Lisa                                                                                                                                                                                 | Barnes            |                              | PhD                     | Rush University Medical Center                         |                                                 |                                                                | Alzheimer's Disease Genetics Consortium                                                           |

## Supplemental Online Content: Nonauthor Collaborators

\*First name, last name, and suffix (if applicable) are required and will appear in PubMed.

| *First Name and Middle Initial(s) | *Last Name | *Suffix (eg, Jr, III) | Academic Degrees | Institution                                       | Location (city, state/province, country) | Role or Contribution, eg, chair, principal investigator | Group (if more than 1 Group listed in the byline) and/or Subgroup (eg, Steering Committee) |
|-----------------------------------|------------|-----------------------|------------------|---------------------------------------------------|------------------------------------------|---------------------------------------------------------|--------------------------------------------------------------------------------------------|
| Sandra                            | Barral     |                       | PhD              | Columbia University                               |                                          |                                                         | Alzheimer's Disease Genetics Consortium                                                    |
| Jackie                            | Bartlett   |                       | PhD              | Case Western Reserve University                   |                                          |                                                         | Alzheimer's Disease Genetics Consortium                                                    |
| Thomas                            | Beach      |                       | MD, PhD          | Banner Sun Health Research Institute              |                                          |                                                         | Alzheimer's Disease Genetics Consortium                                                    |
| James                             | Becker     |                       | PhD              | University of Pittsburgh School of Medicine       |                                          |                                                         | Alzheimer's Disease Genetics Consortium                                                    |
| Gary                              | Beecham    |                       | PhD              | University of Miami                               |                                          |                                                         | Alzheimer's Disease Genetics Consortium                                                    |
| Penelope                          | Benckek    |                       | PhD              | Case Western Reserve University                   |                                          |                                                         | Alzheimer's Disease Genetics Consortium                                                    |
| David                             | Bennett    |                       | MD               | Rush University Medical Center                    |                                          |                                                         | Alzheimer's Disease Genetics Consortium                                                    |
| John                              | Bertelson  |                       | MD               | University of Texas at Austin/Dell Medical School |                                          |                                                         | Alzheimer's Disease Genetics Consortium                                                    |
| Sarah                             | Biber      |                       | PhD              | University of Washington                          |                                          |                                                         | Alzheimer's Disease Genetics Consortium                                                    |
| Thomas                            | Bird       |                       | MD               | University of Washington                          |                                          |                                                         | Alzheimer's Disease Genetics Consortium                                                    |
| Deborah                           | Blacker    |                       | MD               | Harvard School of Public Health                   |                                          |                                                         | Alzheimer's Disease Genetics Consortium                                                    |
| Bradley                           | Boeve      |                       | MD               | Mayo Clinic                                       |                                          |                                                         | Alzheimer's Disease Genetics Consortium                                                    |
| James                             | Bowen      |                       | MD               | Swedish Medical Center                            |                                          |                                                         | Alzheimer's Disease Genetics Consortium                                                    |
| Adam                              | Boxer      |                       | MD, PhD          | University of California San Francisco            |                                          |                                                         | Alzheimer's Disease Genetics Consortium                                                    |
| James                             | Brewer     |                       | MD               | University of California San Diego                |                                          |                                                         | Alzheimer's Disease Genetics Consortium                                                    |

## Supplemental Online Content: Nonauthor Collaborators

\*First name, last name, and suffix (if applicable) are required and will appear in PubMed.

| *First Name and Middle Initial(s) | *Last Name   | *Suffix (eg, Jr, III) | Academic Degrees | Institution                                            | Location (city, state/province, country) | Role or Contribution, eg, chair, principal investigator | Group (if more than 1 Group listed in the byline) and/or Subgroup (eg, Steering Committee) |
|-----------------------------------|--------------|-----------------------|------------------|--------------------------------------------------------|------------------------------------------|---------------------------------------------------------|--------------------------------------------------------------------------------------------|
| James                             | Burke        |                       | MD, PhD          | Duke University                                        |                                          |                                                         | Alzheimer's Disease Genetics Consortium                                                    |
| Jeffery                           | Burns        |                       | MD, MS           | University of Kansas Medical Center                    |                                          |                                                         | Alzheimer's Disease Genetics Consortium                                                    |
| William                           | Bush         |                       | PhD              | Case Western Reserve University                        |                                          |                                                         | Alzheimer's Disease Genetics Consortium                                                    |
| Joseph                            | Buxbaum      |                       | PhD              | Mount Sinai School of Medicine                         |                                          |                                                         | Alzheimer's Disease Genetics Consortium                                                    |
| Goldie                            | Byrd         |                       | PhD              | Wake Forest University                                 |                                          |                                                         | Alzheimer's Disease Genetics Consortium                                                    |
| Laura                             | Cantwell     |                       | MPH              | University of Pennsylvania Perelman School of Medicine |                                          |                                                         | Alzheimer's Disease Genetics Consortium                                                    |
| Chuanhai                          | Cao          |                       | PhD              | University of South Florida                            |                                          |                                                         | Alzheimer's Disease Genetics Consortium                                                    |
| Cynthia                           | Carlsson     |                       | MD               | University of Wisconsin                                |                                          |                                                         | Alzheimer's Disease Genetics Consortium                                                    |
| Minerva                           | Carrasquillo |                       | PhD              | Mayo Clinic                                            |                                          |                                                         | Alzheimer's Disease Genetics Consortium                                                    |
| Kwun                              | Chan         |                       | PhD              | University of Washington                               |                                          |                                                         | Alzheimer's Disease Genetics Consortium                                                    |
| Scott                             | Chase        |                       | PhD              | University of North Carolina                           |                                          |                                                         | Alzheimer's Disease Genetics Consortium                                                    |
| Yen-Chi                           | Chen         |                       | PhD              | University of Washington                               |                                          |                                                         | Alzheimer's Disease Genetics Consortium                                                    |
| Marie-Francoise                   | Chesselet    |                       | PhD              | University of California Los Angeles                   |                                          |                                                         | Alzheimer's Disease Genetics Consortium                                                    |
| Nathaniel                         | Chin         |                       | MD               | University of Wisconsin                                |                                          |                                                         | Alzheimer's Disease Genetics Consortium                                                    |
| Helena                            | Chui         |                       | MD               | University of Southern California                      |                                          |                                                         | Alzheimer's Disease Genetics Consortium                                                    |

## Supplemental Online Content: Nonauthor Collaborators

\*First name, last name, and suffix (if applicable) are required and will appear in PubMed.

| *First Name and Middle Initial(s) | *Last Name    | *Suffix (eg, Jr, III) | Academic Degrees | Institution                                     | Location (city, state/province, country) | Role or Contribution, eg, chair, principal investigator | Group (if more than 1 Group listed in the byline) and/or Subgroup (eg, Steering Committee) |
|-----------------------------------|---------------|-----------------------|------------------|-------------------------------------------------|------------------------------------------|---------------------------------------------------------|--------------------------------------------------------------------------------------------|
| Jaeyoon                           | Chung         |                       | PhD              | Boston University                               |                                          |                                                         | Alzheimer's Disease Genetics Consortium                                                    |
| Suzanne                           | Craft         |                       | PhD              | Wake Forest University                          |                                          |                                                         | Alzheimer's Disease Genetics Consortium                                                    |
| Paul                              | Crane         |                       | MD, MPH          | University of Washington                        |                                          |                                                         | Alzheimer's Disease Genetics Consortium                                                    |
| Carlos                            | Cruchaga      |                       | PhD              | Washington University School of Medicine        |                                          |                                                         | Alzheimer's Disease Genetics Consortium                                                    |
| Michael                           | Cuccaro       |                       | PhD              | University of Miami                             |                                          |                                                         | Alzheimer's Disease Genetics Consortium                                                    |
| Jessica                           | Culhane       |                       | PhD              | University of Washington                        |                                          |                                                         | Alzheimer's Disease Genetics Consortium                                                    |
| C. Munro                          | Cullum        |                       | PhD              | University of Texas Southwestern Medical Center |                                          |                                                         | Alzheimer's Disease Genetics Consortium                                                    |
| Eveleen                           | Darby         |                       | MA, MS           | Baylor College of Medicine                      |                                          |                                                         | Alzheimer's Disease Genetics Consortium                                                    |
| Barbara                           | Davis         |                       | MA, MS           | University of Texas Southwestern Medical Center |                                          |                                                         | Alzheimer's Disease Genetics Consortium                                                    |
| Charles                           | DeCarli       |                       | MD               | University of California Davis                  |                                          |                                                         | Alzheimer's Disease Genetics Consortium                                                    |
| John                              | DeToledo      |                       | MD               | Texas Tech University Health Science Center     |                                          |                                                         | Alzheimer's Disease Genetics Consortium                                                    |
| Dennis                            | Dickson       |                       | MD               | Mayo Clinic                                     |                                          |                                                         | Alzheimer's Disease Genetics Consortium                                                    |
| Nic                               | Dobbins       |                       | PhD              | University of Washington                        |                                          |                                                         | Alzheimer's Disease Genetics Consortium                                                    |
| Ranjan                            | Duara         |                       | MD               | Mount Sinai Medical Center                      |                                          |                                                         | Alzheimer's Disease Genetics Consortium                                                    |
| Nilufer                           | Ertekin-Taner |                       | MD, PhD          | Mayo Clinic                                     |                                          |                                                         | Alzheimer's Disease Genetics Consortium                                                    |

## Supplemental Online Content: Nonauthor Collaborators

\*First name, last name, and suffix (if applicable) are required and will appear in PubMed.

| *First Name and Middle Initial(s) | *Last Name          | *Suffix (eg, Jr, III) | Academic Degrees | Institution                                     | Location (city, state/province, country) | Role or Contribution, eg, chair, principal investigator | Group (if more than 1 Group listed in the byline) and/or Subgroup (eg, Steering Committee) |
|-----------------------------------|---------------------|-----------------------|------------------|-------------------------------------------------|------------------------------------------|---------------------------------------------------------|--------------------------------------------------------------------------------------------|
| Denis                             | Evans               |                       | MD               | Rush University Medical Center                  |                                          |                                                         | Alzheimer's Disease Genetics Consortium                                                    |
| Kelley                            | Faber               |                       | MS               | Indiana University                              |                                          |                                                         | Alzheimer's Disease Genetics Consortium                                                    |
| Thomas                            | Fairchild           |                       | PhD              | University of North Texas Health Science Center |                                          |                                                         | Alzheimer's Disease Genetics Consortium                                                    |
| Daniele                           | Fallin              |                       | PhD              | Johns Hopkins University                        |                                          |                                                         | Alzheimer's Disease Genetics Consortium                                                    |
| Kenneth                           | Fallon              |                       | MD               | University of Alabama at Birmingham             |                                          |                                                         | Alzheimer's Disease Genetics Consortium                                                    |
| David                             | Fardo               |                       | PhD              | University of Kentucky                          |                                          |                                                         | Alzheimer's Disease Genetics Consortium                                                    |
| Martin                            | Farlow              |                       | MD               | Indiana University                              |                                          |                                                         | Alzheimer's Disease Genetics Consortium                                                    |
| John                              | Farrell             |                       | PhD              | Boston University                               |                                          |                                                         | Alzheimer's Disease Genetics Consortium                                                    |
| Lindsay                           | Farrer              |                       | PhD              | Boston University                               |                                          |                                                         | Alzheimer's Disease Genetics Consortium                                                    |
| Victoria                          | Fernandez-Hernandez |                       |                  | Washington University                           |                                          |                                                         | Alzheimer's Disease Genetics Consortium                                                    |
| Tatiana                           | Foroud              |                       | PhD              | Indiana University                              |                                          |                                                         | Alzheimer's Disease Genetics Consortium                                                    |
| Matthew                           | Frosch              |                       | PhD              | Massachusetts General Hospital                  |                                          |                                                         | Alzheimer's Disease Genetics Consortium                                                    |
| Douglas                           | Galasko             |                       | MD               | University of California San Diego              |                                          |                                                         | Alzheimer's Disease Genetics Consortium                                                    |
| Adriana                           | Gamboa              |                       | BS               | University of North Texas Health Science Center |                                          |                                                         | Alzheimer's Disease Genetics Consortium                                                    |
| Daniel                            | Geschwind           |                       | MD, PhD          | University of California Los Angeles            |                                          |                                                         | Alzheimer's Disease Genetics Consortium                                                    |

## Supplemental Online Content: Nonauthor Collaborators

\*First name, last name, and suffix (if applicable) are required and will appear in PubMed.

| *First Name and Middle Initial(s) | *Last Name      | *Suffix (eg, Jr, III) | Academic Degrees | Institution                                     | Location (city, state/province, country) | Role or Contribution, eg, chair, principal investigator | Group (if more than 1 Group listed in the byline) and/or Subgroup (eg, Steering Committee) |
|-----------------------------------|-----------------|-----------------------|------------------|-------------------------------------------------|------------------------------------------|---------------------------------------------------------|--------------------------------------------------------------------------------------------|
| Bernadino                         | Ghetti          |                       | MD               | Indiana University                              |                                          |                                                         | Alzheimer's Disease Genetics Consortium                                                    |
| Alison                            | Goate           |                       | D.Phil           | Mount Sinai School of Medicine                  |                                          |                                                         | Alzheimer's Disease Genetics Consortium                                                    |
| Thomas                            | Grabowski       |                       | MD               | University of Washington                        |                                          |                                                         | Alzheimer's Disease Genetics Consortium                                                    |
| Neill                             | Graff-Radford   |                       | MD               | Mayo Clinic                                     |                                          |                                                         | Alzheimer's Disease Genetics Consortium                                                    |
| Anthony                           | Griswold        |                       | PhD              | University of Miami                             |                                          |                                                         | Alzheimer's Disease Genetics Consortium                                                    |
| Jonathan                          | Haines          |                       | PhD              | Case Western Reserve University                 |                                          |                                                         | Alzheimer's Disease Genetics Consortium                                                    |
| Hakon                             | Hakonarson      |                       | MD, PhD          | Children's Hospital of Philadelphia             |                                          |                                                         | Alzheimer's Disease Genetics Consortium                                                    |
| Kathleen                          | Hall            |                       | PhD              | Indiana University                              |                                          |                                                         | Alzheimer's Disease Genetics Consortium                                                    |
| James                             | Hall            |                       | PhD              | University of North Texas Health Science Center |                                          |                                                         | Alzheimer's Disease Genetics Consortium                                                    |
| Ronald                            | Hamilton        |                       | MD               | University of Pittsburgh                        |                                          |                                                         | Alzheimer's Disease Genetics Consortium                                                    |
| Kara                              | Hamilton-Nelson |                       | MPH              | University of Miami                             |                                          |                                                         | Alzheimer's Disease Genetics Consortium                                                    |
| Xudong                            | Han             |                       | PhD              | Boston University                               |                                          |                                                         | Alzheimer's Disease Genetics Consortium                                                    |
| John                              | Hardy           |                       | PhD              | University College London                       |                                          |                                                         | Alzheimer's Disease Genetics Consortium                                                    |
| Lindy                             | Harrell         |                       | MD, PhD          | University of Alabama at Birmingham             |                                          |                                                         | Alzheimer's Disease Genetics Consortium                                                    |
| Elizabeth                         | Head            |                       | PHD              | University of California Irvine                 |                                          |                                                         | Alzheimer's Disease Genetics Consortium                                                    |

## Supplemental Online Content: Nonauthor Collaborators

\*First name, last name, and suffix (if applicable) are required and will appear in PubMed.

| *First Name and Middle Initial(s) | *Last Name | *Suffix (eg, Jr, III) | Academic Degrees | Institution                                             | Location (city, state/province, country) | Role or Contribution, eg, chair, principal investigator | Group (if more than 1 Group listed in the byline) and/or Subgroup (eg, Steering Committee) |
|-----------------------------------|------------|-----------------------|------------------|---------------------------------------------------------|------------------------------------------|---------------------------------------------------------|--------------------------------------------------------------------------------------------|
| Victor                            | Henderson  |                       | MD, MS           | Stanford University                                     |                                          |                                                         | Alzheimer's Disease Genetics Consortium                                                    |
| Michelle                          | Hernandez  |                       | BS               | Texas Tech University Health Science Center             |                                          |                                                         | Alzheimer's Disease Genetics Consortium                                                    |
| Lindy                             | Harrell    |                       | MD, PhD          | University of Alabama at Birmingham                     |                                          |                                                         | Alzheimer's Disease Genetics Consortium                                                    |
| Lawrence                          | Honig      |                       | MD, PhD          | Columbia University                                     |                                          |                                                         | Alzheimer's Disease Genetics Consortium                                                    |
| Ryan                              | Huebinger  |                       | PhD              | University of Texas Southwestern Medical Center         |                                          |                                                         | Alzheimer's Disease Genetics Consortium                                                    |
| Matthew                           | Huentelman |                       | PhD              | Translational Genomics Research Institute               |                                          |                                                         | Alzheimer's Disease Genetics Consortium                                                    |
| Christine                         | Hulette    |                       | MD               | Duke University                                         |                                          |                                                         | Alzheimer's Disease Genetics Consortium                                                    |
| Bradley                           | Hyman      |                       | MD, PhD          | Massachusetts General Hospital/Harvard Medical School   |                                          |                                                         | Alzheimer's Disease Genetics Consortium                                                    |
| Linda                             | Hynan      |                       | PhD              | University of Texas Southwestern Medical Center         |                                          |                                                         | Alzheimer's Disease Genetics Consortium                                                    |
| Laura                             | Ibanez     |                       | BS               | Washington University                                   |                                          |                                                         | Alzheimer's Disease Genetics Consortium                                                    |
| Philip                            | De Jager   |                       | MD PhD           | Brigham and Women's Hospital and Harvard Medical School |                                          |                                                         | Alzheimer's Disease Genetics Consortium                                                    |
| Gail                              | Jarvik     |                       | PhD              | University of Washington                                |                                          |                                                         | Alzheimer's Disease Genetics Consortium                                                    |
| Suman                             | Jayadev    |                       | MD               | University of Washington                                |                                          |                                                         | Alzheimer's Disease Genetics Consortium                                                    |
| Lee-Way                           | Jin        |                       | MD, PhD          | University of California Davis                          |                                          |                                                         | Alzheimer's Disease Genetics Consortium                                                    |
| Kimberly                          | Johnson    |                       | MSW, PhD         | Texas Tech University Health Science Center             |                                          |                                                         | Alzheimer's Disease Genetics Consortium                                                    |

## Supplemental Online Content: Nonauthor Collaborators

\*First name, last name, and suffix (if applicable) are required and will appear in PubMed.

| *First Name and Middle Initial(s) | *Last Name | *Suffix (eg, Jr, III) | Academic Degrees | Institution                                     | Location (city, state/province, country) | Role or Contribution, eg, chair, principal investigator | Group (if more than 1 Group listed in the byline) and/or Subgroup (eg, Steering Committee) |
|-----------------------------------|------------|-----------------------|------------------|-------------------------------------------------|------------------------------------------|---------------------------------------------------------|--------------------------------------------------------------------------------------------|
| Leigh                             | Johnson    |                       | PhD              | University of North Texas Health Science Center |                                          |                                                         | Alzheimer's Disease Genetics Consortium                                                    |
| Gyungah                           | Jun        |                       | PhD              | Boston University                               |                                          |                                                         | Alzheimer's Disease Genetics Consortium                                                    |
| M. Ilyas                          | Kamboh     |                       | PhD              | University of Pittsburgh                        |                                          |                                                         | Alzheimer's Disease Genetics Consortium                                                    |
| Moon II                           | Kang       |                       | PhD              | Boston University                               |                                          |                                                         | Alzheimer's Disease Genetics Consortium                                                    |
| Anna                              | Karydas    |                       | BA               | University of California San Francisco          |                                          |                                                         | Alzheimer's Disease Genetics Consortium                                                    |
| Gauthreaux                        | Kathryn    |                       | PhD              | University of Washington                        |                                          |                                                         | Alzheimer's Disease Genetics Consortium                                                    |
| Mindy                             | Katz       |                       | MPH              | Albert Einstein College of Medicine             |                                          |                                                         | Alzheimer's Disease Genetics Consortium                                                    |
| John                              | Kauwe      |                       | PhD              | Brigham Young University                        |                                          |                                                         | Alzheimer's Disease Genetics Consortium                                                    |
| Jeffery                           | Kaye       |                       | MD               | Oregon Health & Science University              |                                          |                                                         | Alzheimer's Disease Genetics Consortium                                                    |
| C. Dirk                           | Keene      |                       | MD, PhD          | University of Washington                        |                                          |                                                         | Alzheimer's Disease Genetics Consortium                                                    |
| Benjamin                          | Keller     |                       | PhD              | University of Washington                        |                                          |                                                         | Alzheimer's Disease Genetics Consortium                                                    |
| Aisha                             | Khaleeq    |                       | MD               | Baylor College of Medicine                      |                                          |                                                         | Alzheimer's Disease Genetics Consortium                                                    |
| Ronald                            | Kim        |                       | MD               | University of California Irvine                 |                                          |                                                         | Alzheimer's Disease Genetics Consortium                                                    |
| Janice                            | Knebl      |                       | DO               | University of North Texas Health Science Center |                                          |                                                         | Alzheimer's Disease Genetics Consortium                                                    |
| Neil                              | Kowall     |                       | MD               | Boston University                               |                                          |                                                         | Alzheimer's Disease Genetics Consortium                                                    |

## Supplemental Online Content: Nonauthor Collaborators

\*First name, last name, and suffix (if applicable) are required and will appear in PubMed.

| *First Name and Middle Initial(s) | *Last Name | *Suffix (eg, Jr, III) | Academic Degrees | Institution                                            | Location (city, state/province, country) | Role or Contribution, eg, chair, principal investigator | Group (if more than 1 Group listed in the byline) and/or Subgroup (eg, Steering Committee) |
|-----------------------------------|------------|-----------------------|------------------|--------------------------------------------------------|------------------------------------------|---------------------------------------------------------|--------------------------------------------------------------------------------------------|
| Joel                              | Kramer     |                       | PsyD             | University of California San Francisco                 |                                          |                                                         | Alzheimer's Disease Genetics Consortium                                                    |
| Walter                            | Kukull     |                       | PhD              | University of Washington                               |                                          |                                                         | Alzheimer's Disease Genetics Consortium                                                    |
| Brian                             | Kunkle     |                       | PhD, MPH         | University of Miami                                    |                                          |                                                         | Alzheimer's Disease Genetics Consortium                                                    |
| Amanda                            | Kuzma      |                       | MS               | University of Pennsylvania Perelman School of Medicine |                                          |                                                         | Alzheimer's Disease Genetics Consortium                                                    |
| Frank                             | LaFerla    |                       | PhD              | University of California Irvine                        |                                          |                                                         | Alzheimer's Disease Genetics Consortium                                                    |
| James                             | Lah        |                       | PhD              | Emory University                                       |                                          |                                                         | Alzheimer's Disease Genetics Consortium                                                    |
| Eric                              | Larson     |                       | MD, MPH          | University of Washington                               |                                          |                                                         | Alzheimer's Disease Genetics Consortium                                                    |
| Melissa                           | Lerch      |                       | PhD              | University of Washington                               |                                          |                                                         | Alzheimer's Disease Genetics Consortium                                                    |
| Alan                              | Lerner     |                       | MD               | Case Western Reserve University                        |                                          |                                                         | Alzheimer's Disease Genetics Consortium                                                    |
| Yuk Ye                            | Leung      |                       | PhD              | University of Pennsylvania Perelman School of Medicine |                                          |                                                         | Alzheimer's Disease Genetics Consortium                                                    |
| James                             | Leverenz   |                       | MD               | Cleveland Clinic                                       |                                          |                                                         | Alzheimer's Disease Genetics Consortium                                                    |
| Allan                             | Levey      |                       | MD, PhD          | Emory University                                       |                                          |                                                         | Alzheimer's Disease Genetics Consortium                                                    |
| Donghe                            | Li         |                       | PhD              | Boston University                                      |                                          |                                                         | Alzheimer's Disease Genetics Consortium                                                    |
| Andrew                            | Lieberman  |                       | MD, PhD          | University of Michigan                                 |                                          |                                                         | Alzheimer's Disease Genetics Consortium                                                    |
| Richard                           | Lipton     |                       | MD               | Albert Einstein College of Medicine                    |                                          |                                                         | Alzheimer's Disease Genetics Consortium                                                    |

## Supplemental Online Content: Nonauthor Collaborators

\*First name, last name, and suffix (if applicable) are required and will appear in PubMed.

| *First Name and Middle Initial(s) | *Last Name | *Suffix (eg, Jr, III) | Academic Degrees | Institution                                                  | Location (city, state/province, country) | Role or Contribution, eg, chair, principal investigator | Group (if more than 1 Group listed in the byline) and/or Subgroup (eg, Steering Committee) |
|-----------------------------------|------------|-----------------------|------------------|--------------------------------------------------------------|------------------------------------------|---------------------------------------------------------|--------------------------------------------------------------------------------------------|
| Oscar                             | Lopez      |                       | MD               | University of Pittsburgh Alzheimer's Disease Research Center |                                          |                                                         | Alzheimer's Disease Genetics Consortium                                                    |
| Kathryn                           | Lunetta    |                       | PhD              | Boston University                                            |                                          |                                                         | Alzheimer's Disease Genetics Consortium                                                    |
| Constantine                       | Lyketsos   |                       | MD, MHS          | Johns Hopkins University                                     |                                          |                                                         | Alzheimer's Disease Genetics Consortium                                                    |
| Douglas                           | Mains      |                       | DrPH             | University of North Texas Health Science Center              |                                          |                                                         | Alzheimer's Disease Genetics Consortium                                                    |
| Jennifer                          | Manly      |                       | PhD              | Columbia University                                          |                                          |                                                         | Alzheimer's Disease Genetics Consortium                                                    |
| Logue                             | Mark       |                       | PhD              | Boston University                                            |                                          |                                                         | Alzheimer's Disease Genetics Consortium                                                    |
| David                             | Marquez    |                       | PhD              | Rush University Medical Center                               |                                          |                                                         | Alzheimer's Disease Genetics Consortium                                                    |
| Daniel                            | Marson     |                       | JD, PhD          | University of Alabama at Birmingham                          |                                          |                                                         | Alzheimer's Disease Genetics Consortium                                                    |
| Eden                              | Martin     |                       | PhD              | University of Miami                                          |                                          |                                                         | Alzheimer's Disease Genetics Consortium                                                    |
| Eliezer                           | Masliah    |                       | MD               | University of California San Diego                           |                                          |                                                         | Alzheimer's Disease Genetics Consortium                                                    |
| Paul                              | Massman    |                       | PhD              | Baylor College of Medicine                                   |                                          |                                                         | Alzheimer's Disease Genetics Consortium                                                    |
| Arjun                             | Masukar    |                       | MD, PhD          | New York University                                          |                                          |                                                         | Alzheimer's Disease Genetics Consortium                                                    |
| Richard                           | Mayeux     |                       | MD               | Columbia University                                          |                                          |                                                         | Alzheimer's Disease Genetics Consortium                                                    |
| Wayne                             | McCormick  |                       | MD, MPH          | University of Washington                                     |                                          |                                                         | Alzheimer's Disease Genetics Consortium                                                    |
| Susan                             | McCurry    |                       | PhD              | University of Washington                                     |                                          |                                                         | Alzheimer's Disease Genetics Consortium                                                    |

## Supplemental Online Content: Nonauthor Collaborators

\*First name, last name, and suffix (if applicable) are required and will appear in PubMed.

| *First Name and Middle Initial(s) | *Last Name | *Suffix (eg, Jr, III) | Academic Degrees | Institution                                            | Location (city, state/province, country) | Role or Contribution, eg, chair, principal investigator | Group (if more than 1 Group listed in the byline) and/or Subgroup (eg, Steering Committee) |
|-----------------------------------|------------|-----------------------|------------------|--------------------------------------------------------|------------------------------------------|---------------------------------------------------------|--------------------------------------------------------------------------------------------|
| Stefan                            | McDonough  |                       | PhD              | Pfizer Worldwide Research and Development              |                                          |                                                         | Alzheimer's Disease Genetics Consortium                                                    |
| Ann                               | McKee      |                       | MD               | Boston University                                      |                                          |                                                         | Alzheimer's Disease Genetics Consortium                                                    |
| Marsel                            | Mesulam    |                       | MD               | Northwestern University Feinberg School of Medicine    |                                          |                                                         | Alzheimer's Disease Genetics Consortium                                                    |
| Jesse                             | Mez        |                       | PhD              | Boston University                                      |                                          |                                                         | Alzheimer's Disease Genetics Consortium                                                    |
| Bruce                             | Miller     |                       | MD               | University of California San Francisco                 |                                          |                                                         | Alzheimer's Disease Genetics Consortium                                                    |
| Carol                             | Miller     |                       | MD               | University of Southern California                      |                                          |                                                         | Alzheimer's Disease Genetics Consortium                                                    |
| Charles                           | Mock       |                       | PhD              | University of Washington                               |                                          |                                                         | Alzheimer's Disease Genetics Consortium                                                    |
| Abhay                             | Moghekar   |                       | MD               | Johns Hopkins University                               |                                          |                                                         | Alzheimer's Disease Genetics Consortium                                                    |
| Thomas                            | Montine    |                       | MD, PhD          | University of Washington                               |                                          |                                                         | Alzheimer's Disease Genetics Consortium                                                    |
| Edwin                             | Monuki     |                       |                  | University of California Irvine                        |                                          |                                                         | Alzheimer's Disease Genetics Consortium                                                    |
| Sean                              | Mooney     |                       | PhD              | University of Washington                               |                                          |                                                         | Alzheimer's Disease Genetics Consortium                                                    |
| John                              | Morris     |                       | MD               | Washington University                                  |                                          |                                                         | Alzheimer's Disease Genetics Consortium                                                    |
| Shubhabrata                       | Mukherjee  |                       | PhD              | University of Washington                               |                                          |                                                         | Alzheimer's Disease Genetics Consortium                                                    |
| Amanda                            | Myers      |                       | PhD              | University of Miami                                    |                                          |                                                         | Alzheimer's Disease Genetics Consortium                                                    |
| Adam                              | Naj        |                       | PhD              | University of Pennsylvania Perelman School of Medicine |                                          |                                                         | Alzheimer's Disease Genetics Consortium                                                    |

## Supplemental Online Content: Nonauthor Collaborators

\*First name, last name, and suffix (if applicable) are required and will appear in PubMed.

| *First Name and Middle Initial(s) | *Last Name    | *Suffix (eg, Jr, III) | Academic Degrees | Institution                                             | Location (city, state/province, country) | Role or Contribution, eg, chair, principal investigator | Group (if more than 1 Group listed in the byline) and/or Subgroup (eg, Steering Committee) |
|-----------------------------------|---------------|-----------------------|------------------|---------------------------------------------------------|------------------------------------------|---------------------------------------------------------|--------------------------------------------------------------------------------------------|
| Trung                             | Nguyen        |                       | PhD              | University of Texas Southwestern Medical Center         |                                          |                                                         | Alzheimer's Disease Genetics Consortium                                                    |
| Sid                               | O'Bryant      |                       | PhD              | University of North Texas Health Science Center         |                                          |                                                         | Alzheimer's Disease Genetics Consortium                                                    |
| Kyle                              | Ormsby        |                       | PhD              | University of Washington                                |                                          |                                                         | Alzheimer's Disease Genetics Consortium                                                    |
| Marcia                            | Ory           |                       | PhD, MPH         | Texas A&M University Health Science Center              |                                          |                                                         | Alzheimer's Disease Genetics Consortium                                                    |
| Raymond                           | Palmer        |                       | PhD              | University of Texas Health Science Center - San Antonio |                                          |                                                         | Alzheimer's Disease Genetics Consortium                                                    |
| Joseph                            | Parisi        |                       | MD               | Mayo Clinic                                             |                                          |                                                         | Alzheimer's Disease Genetics Consortium                                                    |
| Henry                             | Paulson       |                       | MD, PhD          | University of Michigan                                  |                                          |                                                         | Alzheimer's Disease Genetics Consortium                                                    |
| Valory                            | Pavlik        |                       | PhD              | Baylor College of Medicine                              |                                          |                                                         | Alzheimer's Disease Genetics Consortium                                                    |
| David                             | Paydarfar     |                       | MD               | University of Texas at Austin/Dell Medical School       |                                          |                                                         | Alzheimer's Disease Genetics Consortium                                                    |
| Victoria                          | Perez         |                       |                  | Texas Tech University Health Science Center             |                                          |                                                         | Alzheimer's Disease Genetics Consortium                                                    |
| Margaret                          | Pericak-Vance |                       | PhD              | University of Miami                                     |                                          |                                                         | Alzheimer's Disease Genetics Consortium                                                    |
| Ronald                            | Peterson      |                       | MD, PhD          | Mayo Clinic                                             |                                          |                                                         | Alzheimer's Disease Genetics Consortium                                                    |
| Marsha                            | Polk          |                       |                  | University of Texas Health Science Center - San Antonio |                                          |                                                         | Alzheimer's Disease Genetics Consortium                                                    |
| Liming                            | Qu            |                       | MS               | University of Pennsylvania Perelman School of Medicine  |                                          |                                                         | Alzheimer's Disease Genetics Consortium                                                    |
| Mary                              | Quiceno       |                       | MD               | University of Texas Southwestern Medical Center         |                                          |                                                         | Alzheimer's Disease Genetics Consortium                                                    |

## Supplemental Online Content: Nonauthor Collaborators

\*First name, last name, and suffix (if applicable) are required and will appear in PubMed.

| *First Name and Middle Initial(s) | *Last Name | *Suffix (eg, Jr, III) | Academic Degrees | Institution                                                                               | Location (city, state/province, country) | Role or Contribution, eg, chair, principal investigator | Group (if more than 1 Group listed in the byline) and/or Subgroup (eg, Steering Committee) |
|-----------------------------------|------------|-----------------------|------------------|-------------------------------------------------------------------------------------------|------------------------------------------|---------------------------------------------------------|--------------------------------------------------------------------------------------------|
| Joseph                            | Quinn      |                       | MD               | Oregon Health & Science University                                                        |                                          |                                                         | Alzheimer's Disease Genetics Consortium                                                    |
| Ashok                             | Raj        |                       | MD               | University of South Florida                                                               |                                          |                                                         | Alzheimer's Disease Genetics Consortium                                                    |
| Farid                             | Rajabli    |                       | PhD              | University of Miami                                                                       |                                          |                                                         | Alzheimer's Disease Genetics Consortium                                                    |
| Vijay                             | Ramanan    |                       | PhD              | Mayo Clinic                                                                               |                                          |                                                         | Alzheimer's Disease Genetics Consortium                                                    |
| Eric                              | Reiman     |                       | MD               | Translational Genomics Research Institute                                                 |                                          |                                                         | Alzheimer's Disease Genetics Consortium                                                    |
| Joan                              | Reisch     |                       | PhD              | University of Texas Southwestern Medical Center                                           |                                          |                                                         | Alzheimer's Disease Genetics Consortium                                                    |
| Christiane                        | Reitz      |                       | PhD              | Columbia University                                                                       |                                          |                                                         | Alzheimer's Disease Genetics Consortium                                                    |
| John                              | Ringman    |                       | MD               | University of Southern California                                                         |                                          |                                                         | Alzheimer's Disease Genetics Consortium                                                    |
| Erik                              | Robertson  |                       | MD, PhD          | University of Alabama at Birmingham                                                       |                                          |                                                         | Alzheimer's Disease Genetics Consortium                                                    |
| Monica                            | Rodriguear |                       | MA, MS           | Baylor College of Medicine                                                                |                                          |                                                         | Alzheimer's Disease Genetics Consortium                                                    |
| Ekaterina                         | Rogaeva    |                       | PhD              | University of Toronto                                                                     |                                          |                                                         | Alzheimer's Disease Genetics Consortium                                                    |
| Howard                            | Rosen      |                       | MD               | University of California San Francisco                                                    |                                          |                                                         | Alzheimer's Disease Genetics Consortium                                                    |
| Roger                             | Rosenberg  |                       | MD               | University of Texas Southwestern                                                          |                                          |                                                         | Alzheimer's Disease Genetics Consortium                                                    |
| Donald                            | Royall     |                       | MD               | South Texas Veterans Health Administration Geriatric Research Education & Clinical Center |                                          |                                                         | Alzheimer's Disease Genetics Consortium                                                    |
| Mary                              | Sano       |                       | PhD              | Mount Sinai School of Medicine                                                            |                                          |                                                         | Alzheimer's Disease Genetics Consortium                                                    |

## Supplemental Online Content: Nonauthor Collaborators

\*First name, last name, and suffix (if applicable) are required and will appear in PubMed.

| *First Name and Middle Initial(s) | *Last Name       | *Suffix (eg, Jr, III) | Academic Degrees | Institution                                            | Location (city, state/province, country) | Role or Contribution, eg, chair, principal investigator | Group (if more than 1 Group listed in the byline) and/or Subgroup (eg, Steering Committee) |
|-----------------------------------|------------------|-----------------------|------------------|--------------------------------------------------------|------------------------------------------|---------------------------------------------------------|--------------------------------------------------------------------------------------------|
| Andrew                            | Saykin           |                       | PsyD             | Indiana University                                     |                                          |                                                         | Alzheimer's Disease Genetics Consortium                                                    |
| Gerard                            | Schellenberg     |                       | PhD              | University of Pennsylvania Perelman School of Medicine |                                          |                                                         | Alzheimer's Disease Genetics Consortium                                                    |
| Julie                             | Schneider        |                       | MD               | Rush University Medical Center                         |                                          |                                                         | Alzheimer's Disease Genetics Consortium                                                    |
| Lon                               | Schneider        |                       | MD               | University of Southern California                      |                                          |                                                         | Alzheimer's Disease Genetics Consortium                                                    |
| William                           | Seeley           |                       | MD               | University of California San Francisco                 |                                          |                                                         | Alzheimer's Disease Genetics Consortium                                                    |
| Richard                           | Sherva           |                       | PhD              | Boston University                                      |                                          |                                                         | Alzheimer's Disease Genetics Consortium                                                    |
| Dean                              | Shibata          |                       | PhD              | University of Washington                               |                                          |                                                         | Alzheimer's Disease Genetics Consortium                                                    |
| Scott                             | Small            |                       | MD               | Columbia University                                    |                                          |                                                         | Alzheimer's Disease Genetics Consortium                                                    |
| Amanda                            | Smith            |                       | MD               | University of South Florida                            |                                          |                                                         | Alzheimer's Disease Genetics Consortium                                                    |
| Janet                             | Smith            |                       | BS               | University of Texas Southwestern Medical Center        |                                          |                                                         | Alzheimer's Disease Genetics Consortium                                                    |
| Yeunjoo                           | Song             |                       | PhD              | Case Western Reserve University                        |                                          |                                                         | Alzheimer's Disease Genetics Consortium                                                    |
| Salvatore                         | Spina            |                       | MD               | Indiana University                                     |                                          |                                                         | Alzheimer's Disease Genetics Consortium                                                    |
| Peter                             | St George-Hyslop |                       | MD, FRCP         | University of Toronto                                  |                                          |                                                         | Alzheimer's Disease Genetics Consortium                                                    |
| Robert                            | Stern            |                       | PhD              | Boston University                                      |                                          |                                                         | Alzheimer's Disease Genetics Consortium                                                    |
| Alan                              | Stevens          |                       | PhD              | Texas A&M University Health Science Center             |                                          |                                                         | Alzheimer's Disease Genetics Consortium                                                    |

Supplemental Online Content: Nonauthor Collaborators

\*First name, last name, and suffix (if applicable) are required and will appear in PubMed.

| *First Name and Middle Initial(s) | *Last Name   | *Suffix (eg, Jr, III) | Academic Degrees | Institution                                            | Location (city, state/province, country) | Role or Contribution, eg, chair, principal investigator | Group (if more than 1 Group listed in the byline) and/or Subgroup (eg, Steering Committee) |
|-----------------------------------|--------------|-----------------------|------------------|--------------------------------------------------------|------------------------------------------|---------------------------------------------------------|--------------------------------------------------------------------------------------------|
| Stephen                           | Strittmatter |                       | MD, PhD          | Yale University                                        |                                          |                                                         | Alzheimer's Disease Genetics Consortium                                                    |
| David                             | Sultzer      |                       |                  | University of California Irvine                        |                                          |                                                         | Alzheimer's Disease Genetics Consortium                                                    |
| Russell                           | Swerdlow     |                       | MD               | University of Kansas Medical Center                    |                                          |                                                         | Alzheimer's Disease Genetics Consortium                                                    |
| Jeffery                           | Tilson       |                       | PhD              | University of North Carolina                           |                                          |                                                         | Alzheimer's Disease Genetics Consortium                                                    |
| Giuseppe                          | Tosto        |                       | MD               | Columbia University                                    |                                          |                                                         | Alzheimer's Disease Genetics Consortium                                                    |
| John                              | Trojanowski  |                       | MD, PhD          | University of Pennsylvania Perelman School of Medicine |                                          |                                                         | Alzheimer's Disease Genetics Consortium                                                    |
| Juan                              | Troncoso     |                       | MD               | Johns Hopkins University                               |                                          |                                                         | Alzheimer's Disease Genetics Consortium                                                    |
| Debby                             | Tsuang       |                       | MD               | VA Puget Sound Health Care System/GRECC                |                                          |                                                         | Alzheimer's Disease Genetics Consortium                                                    |
| Otto                              | Valladares   |                       | MS               | University of Pennsylvania Perelman School of Medicine |                                          |                                                         | Alzheimer's Disease Genetics Consortium                                                    |
| Jeffery                           | Vance        |                       | MD, PhD          | University of Miami                                    |                                          |                                                         | Alzheimer's Disease Genetics Consortium                                                    |
| Vivianna                          | Van Deerlin  |                       | MD, PhD          | University of Pennsylvania Perelman School of Medicine |                                          |                                                         | Alzheimer's Disease Genetics Consortium                                                    |
| Linda                             | Van Eldik    |                       | PhD              | University of Kentucky                                 |                                          |                                                         | Alzheimer's Disease Genetics Consortium                                                    |
| Badri                             | Vardarajan   |                       | MS               | Columbia University                                    |                                          |                                                         | Alzheimer's Disease Genetics Consortium                                                    |
| Robert                            | Vassar       |                       | PhD              | Northwestern University Feinberg School of Medicine    |                                          |                                                         | Alzheimer's Disease Genetics Consortium                                                    |
| Harry                             | Vinters      |                       | MD               | University of California Los Angeles                   |                                          |                                                         | Alzheimer's Disease Genetics Consortium                                                    |

## Supplemental Online Content: Nonauthor Collaborators

\*First name, last name, and suffix (if applicable) are required and will appear in PubMed.

| *First Name and Middle Initial(s) | *Last Name   | *Suffix (eg, Jr, III) | Academic Degrees | Institution                                            | Location (city, state/province, country) | Role or Contribution, eg, chair, principal investigator | Group (if more than 1 Group listed in the byline) and/or Subgroup (eg, Steering Committee) |
|-----------------------------------|--------------|-----------------------|------------------|--------------------------------------------------------|------------------------------------------|---------------------------------------------------------|--------------------------------------------------------------------------------------------|
| Jean Paul                         | Vonsattel    |                       | MD               | Columbia University                                    |                                          |                                                         | Alzheimer's Disease Genetics Consortium                                                    |
| Li San                            | Wang         |                       | PhD              | University of Pennsylvania Perelman School of Medicine |                                          |                                                         | Alzheimer's Disease Genetics Consortium                                                    |
| Sandra                            | Weintraub    |                       | PhD              | Northwestern University Feinberg School of Medicine    |                                          |                                                         | Alzheimer's Disease Genetics Consortium                                                    |
| Kathleen                          | Welsh-Bohmer |                       | PhD              | Duke University                                        |                                          |                                                         | Alzheimer's Disease Genetics Consortium                                                    |
| Nick                              | Wheeler      |                       | PhD              | Case Western Reserve University                        |                                          |                                                         | Alzheimer's Disease Genetics Consortium                                                    |
| Ellen                             | Wijsman      |                       | PhD              | University of Washington                               |                                          |                                                         | Alzheimer's Disease Genetics Consortium                                                    |
| Kirk                              | Wilhelmsen   |                       | MD, PhD          | University of North Carolina Chapel Hill               |                                          |                                                         | Alzheimer's Disease Genetics Consortium                                                    |
| Scott                             | Williams     |                       | PhD              | Case Western Reserve University                        |                                          |                                                         | Alzheimer's Disease Genetics Consortium                                                    |
| Benjamin                          | Williams     |                       | MD               | University of Texas Southwestern Medical Center        |                                          |                                                         | Alzheimer's Disease Genetics Consortium                                                    |
| Jennifer                          | Williamson   |                       | MS               | Columbia University                                    |                                          |                                                         | Alzheimer's Disease Genetics Consortium                                                    |
| Henrick                           | Wilms        |                       | MD               | Texas Tech University Health Science Center            |                                          |                                                         | Alzheimer's Disease Genetics Consortium                                                    |
| Thomas                            | Wingo        |                       | MD               | Emory University                                       |                                          |                                                         | Alzheimer's Disease Genetics Consortium                                                    |
| Randall                           | Woltjer      |                       | MD, PhD          | Oregon Health & Science University                     |                                          |                                                         | Alzheimer's Disease Genetics Consortium                                                    |
| Martin                            | Woon         |                       | PhD              | University of Texas at Austin/Dell Medical School      |                                          |                                                         | Alzheimer's Disease Genetics Consortium                                                    |
| Steven                            | Younkin      |                       | MD, PhD          | Mayo Clinic                                            |                                          |                                                         | Alzheimer's Disease Genetics Consortium                                                    |

## Supplemental Online Content: Nonauthor Collaborators

\*First name, last name, and suffix (if applicable) are required and will appear in PubMed.

| *First Name and Middle Initial(s) | *Last Name | *Suffix (eg, Jr, III) | Academic Degrees | Institution                                            | Location (city, state/province, country) | Role or Contribution, eg, chair, principal investigator | Group (if more than 1 Group listed in the byline) and/or Subgroup (eg, Steering Committee) |
|-----------------------------------|------------|-----------------------|------------------|--------------------------------------------------------|------------------------------------------|---------------------------------------------------------|--------------------------------------------------------------------------------------------|
| Lei                               | Yu         |                       | PhD              | Rush University Medical Center                         |                                          |                                                         | Alzheimer's Disease Genetics Consortium                                                    |
| Yi                                | Zhao       |                       | MS               | University of Pennsylvania Perelman School of Medicine |                                          |                                                         | Alzheimer's Disease Genetics Consortium                                                    |
| Xiongwei                          | Zhou       |                       | PhD              | Case Western Reserve University                        |                                          |                                                         | Alzheimer's Disease Genetics Consortium                                                    |
| Congcong                          | Zhu        |                       |                  | Boston University                                      |                                          |                                                         | Alzheimer's Disease Genetics Consortium                                                    |
| Olusegun                          | Adegoke    |                       | MSc              |                                                        |                                          |                                                         | Alzheimer's Disease Neuroimaging Initiative                                                |
| Paul                              | Aisen      |                       | MD               |                                                        |                                          |                                                         | Alzheimer's Disease Neuroimaging Initiative                                                |
| Liana G.                          | Apostolova |                       | MD               |                                                        |                                          |                                                         | Alzheimer's Disease Neuroimaging Initiative                                                |
| Miriam                            | Ashford    |                       | PhD              |                                                        |                                          |                                                         | Alzheimer's Disease Neuroimaging Initiative                                                |
| Lisa                              | Barnes     |                       | PhD              |                                                        |                                          |                                                         | Alzheimer's Disease Neuroimaging Initiative                                                |
| Laurel                            | Beckett    |                       | PhD              |                                                        |                                          |                                                         | Alzheimer's Disease Neuroimaging Initiative                                                |
| Marie                             | Bernard    |                       | MD               |                                                        |                                          |                                                         | Alzheimer's Disease Neuroimaging Initiative                                                |

## Supplemental Online Content: Nonauthor Collaborators

\*First name, last name, and suffix (if applicable) are required and will appear in PubMed.

| *First Name and Middle Initial(s) | *Last Name | *Suffix (eg, Jr, III) | Academic Degrees | Institution | Location (city, state/province, country) | Role or Contribution, eg, chair, principal investigator | Group (if more than 1 Group listed in the byline) and/or Subgroup (eg, Steering Committee) |
|-----------------------------------|------------|-----------------------|------------------|-------------|------------------------------------------|---------------------------------------------------------|--------------------------------------------------------------------------------------------|
| Haley                             | Bernhardt  |                       | BA, R. EEG<br>T  |             |                                          |                                                         | Alzheimer's Disease<br>Neuroimaging Initiative                                             |
| Bret                              | Borowski   |                       | RTR              |             |                                          |                                                         | Alzheimer's Disease<br>Neuroimaging Initiative                                             |
| Yuliana                           | Cabrera    |                       | BS               |             |                                          |                                                         | Alzheimer's Disease<br>Neuroimaging Initiative                                             |
| Nigel J.                          | Cairns     |                       | PhD,<br>FRCPath  |             |                                          |                                                         | Alzheimer's Disease<br>Neuroimaging Initiative                                             |
| Maria                             | Carrillo   |                       | PhD              |             |                                          |                                                         | Alzheimer's Disease<br>Neuroimaging Initiative                                             |
| Kewei                             | Chen       |                       | PhD              |             |                                          |                                                         | Alzheimer's Disease<br>Neuroimaging Initiative                                             |
| Mark                              | Choe       |                       | BS               |             |                                          |                                                         | Alzheimer's Disease<br>Neuroimaging Initiative                                             |
| Taylor                            | Clanton    |                       | MPH              |             |                                          |                                                         | Alzheimer's Disease<br>Neuroimaging Initiative                                             |
| Godfrey                           | Coker      |                       | MBA,<br>MPH      |             |                                          |                                                         | Alzheimer's Disease<br>Neuroimaging Initiative                                             |
| Cat                               | Conti      |                       | BA               |             |                                          |                                                         | Alzheimer's Disease<br>Neuroimaging Initiative                                             |

## Supplemental Online Content: Nonauthor Collaborators

\*First name, last name, and suffix (if applicable) are required and will appear in PubMed.

| *First Name and Middle Initial(s) | *Last Name       | *Suffix (eg, Jr, III) | Academic Degrees | Institution | Location (city, state/province, country) | Role or Contribution, eg, chair, principal investigator | Group (if more than 1 Group listed in the byline) and/or Subgroup (eg, Steering Committee) |
|-----------------------------------|------------------|-----------------------|------------------|-------------|------------------------------------------|---------------------------------------------------------|--------------------------------------------------------------------------------------------|
| Karen                             | Crawford         |                       |                  |             |                                          |                                                         | Alzheimer's Disease Neuroimaging Initiative                                                |
| Sandhitsu                         | Das              |                       | PhD              |             |                                          |                                                         | Alzheimer's Disease Neuroimaging Initiative                                                |
| Charles                           | DeCarli          |                       | MD               |             |                                          |                                                         | Alzheimer's Disease Neuroimaging Initiative                                                |
| Michael                           | Donohue          |                       | PhD              |             |                                          |                                                         | Alzheimer's Disease Neuroimaging Initiative                                                |
| Kelley                            | Faber            |                       | MS, CCRC         |             |                                          |                                                         | Alzheimer's Disease Neuroimaging Initiative                                                |
| Adam                              | Fleisher         |                       | MD               |             |                                          |                                                         | Alzheimer's Disease Neuroimaging Initiative                                                |
| Derek                             | Flenneiken       |                       |                  |             |                                          |                                                         | Alzheimer's Disease Neuroimaging Initiative                                                |
| Evan                              | Fletcher         |                       | PhD              |             |                                          |                                                         | Alzheimer's Disease Neuroimaging Initiative                                                |
| Juliet                            | Fockler          |                       |                  |             |                                          |                                                         | Alzheimer's Disease Neuroimaging Initiative                                                |
| Arvin                             | Forghanian-Arani |                       | PhD              |             |                                          |                                                         | Alzheimer's Disease Neuroimaging Initiative                                                |

## Supplemental Online Content: Nonauthor Collaborators

\*First name, last name, and suffix (if applicable) are required and will appear in PubMed.

| *First Name and Middle Initial(s) | *Last Name   | *Suffix (eg, Jr, III) | Academic Degrees | Institution | Location (city, state/province, country) | Role or Contribution, eg, chair, principal investigator | Group (if more than 1 Group listed in the byline) and/or Subgroup (eg, Steering Committee) |
|-----------------------------------|--------------|-----------------------|------------------|-------------|------------------------------------------|---------------------------------------------------------|--------------------------------------------------------------------------------------------|
| Tatiana M.                        | Foroud       |                       | PhD              |             |                                          |                                                         | Alzheimer's Disease Neuroimaging Initiative                                                |
| Nick C.                           | Fox          |                       | MD               |             |                                          |                                                         | Alzheimer's Disease Neuroimaging Initiative                                                |
| Erin                              | Franklin     |                       | MS               |             |                                          |                                                         | Alzheimer's Disease Neuroimaging Initiative                                                |
| Devon                             | Gessert      |                       | BS               |             |                                          |                                                         | Alzheimer's Disease Neuroimaging Initiative                                                |
| Hector                            | González     |                       |                  |             |                                          |                                                         | Alzheimer's Disease Neuroimaging Initiative                                                |
| Robert C.                         | Green        |                       | MD, MPH          |             |                                          |                                                         | Alzheimer's Disease Neuroimaging Initiative                                                |
| Jeffery                           | Gunter       |                       | PhD              |             |                                          |                                                         | Alzheimer's Disease Neuroimaging Initiative                                                |
| Danielle                          | Harvey       |                       | PhD              |             |                                          |                                                         | Alzheimer's Disease Neuroimaging Initiative                                                |
| Lindsey                           | Hergesheimer |                       | BS               |             |                                          |                                                         | Alzheimer's Disease Neuroimaging Initiative                                                |
| Carole                            | Ho           |                       |                  |             |                                          |                                                         | Alzheimer's Disease Neuroimaging Initiative                                                |

## Supplemental Online Content: Nonauthor Collaborators

\*First name, last name, and suffix (if applicable) are required and will appear in PubMed.

| *First Name and Middle Initial(s) | *Last Name  | *Suffix (eg, Jr, III) | Academic Degrees | Institution | Location (city, state/province, country) | Role or Contribution, eg, chair, principal investigator | Group (if more than 1 Group listed in the byline) and/or Subgroup (eg, Steering Committee) |
|-----------------------------------|-------------|-----------------------|------------------|-------------|------------------------------------------|---------------------------------------------------------|--------------------------------------------------------------------------------------------|
| Erin                              | Householder |                       | MS               |             |                                          |                                                         | Alzheimer's Disease Neuroimaging Initiative                                                |
| John K.                           | Hsaio       |                       | MD               |             |                                          |                                                         | Alzheimer's Disease Neuroimaging Initiative                                                |
| Clifford R.                       | Jack        | Jr                    | MD               |             |                                          |                                                         | Alzheimer's Disease Neuroimaging Initiative                                                |
| Jonathan                          | Jackson     |                       | PhD              |             |                                          |                                                         | Alzheimer's Disease Neuroimaging Initiative                                                |
| William                           | Jagust      |                       | MD               |             |                                          |                                                         | Alzheimer's Disease Neuroimaging Initiative                                                |
| Neda                              | Jahanshad   |                       | PhD              |             |                                          |                                                         | Alzheimer's Disease Neuroimaging Initiative                                                |
| Gustavo                           | Jimenez     |                       | MBS              |             |                                          |                                                         | Alzheimer's Disease Neuroimaging Initiative                                                |
| Chengshu                          | Jin         |                       | PhD              |             |                                          |                                                         | Alzheimer's Disease Neuroimaging Initiative                                                |
| David                             | Jones       |                       | MD               |             |                                          |                                                         | Alzheimer's Disease Neuroimaging Initiative                                                |
| Kejal                             | Kantarci    |                       | MD               |             |                                          |                                                         | Alzheimer's Disease Neuroimaging Initiative                                                |

## Supplemental Online Content: Nonauthor Collaborators

\*First name, last name, and suffix (if applicable) are required and will appear in PubMed.

| *First Name and Middle Initial(s) | *Last Name   | *Suffix (eg, Jr, III) | Academic Degrees | Institution | Location (city, state/province, country) | Role or Contribution, eg, chair, principal investigator | Group (if more than 1 Group listed in the byline) and/or Subgroup (eg, Steering Committee) |
|-----------------------------------|--------------|-----------------------|------------------|-------------|------------------------------------------|---------------------------------------------------------|--------------------------------------------------------------------------------------------|
| Zaven                             | Khachaturian |                       | PhD              |             |                                          |                                                         | Alzheimer's Disease Neuroimaging Initiative                                                |
| Alexander                         | Knaack       |                       | MS               |             |                                          |                                                         | Alzheimer's Disease Neuroimaging Initiative                                                |
| Robert A.                         | Koeppel      |                       | PhD              |             |                                          |                                                         | Alzheimer's Disease Neuroimaging Initiative                                                |
| Adrienne                          | Kormos       |                       |                  |             |                                          |                                                         | Alzheimer's Disease Neuroimaging Initiative                                                |
| Susan                             | Landau       |                       | PhD              |             |                                          |                                                         | Alzheimer's Disease Neuroimaging Initiative                                                |
| Payam                             | Mahboubi     |                       | MPH              |             |                                          |                                                         | Alzheimer's Disease Neuroimaging Initiative                                                |
| Ian                               | Malone       |                       | PhD              |             |                                          |                                                         | Alzheimer's Disease Neuroimaging Initiative                                                |
| Eliezer                           | Masliah      |                       | MD               |             |                                          |                                                         | Alzheimer's Disease Neuroimaging Initiative                                                |
| Donna                             | Masterman    |                       | <D               |             |                                          |                                                         | Alzheimer's Disease Neuroimaging Initiative                                                |
| Chet                              | Mathis       |                       | MD               |             |                                          |                                                         | Alzheimer's Disease Neuroimaging Initiative                                                |

## Supplemental Online Content: Nonauthor Collaborators

\*First name, last name, and suffix (if applicable) are required and will appear in PubMed.

| *First Name and Middle Initial(s) | *Last Name | *Suffix (eg, Jr, III) | Academic Degrees | Institution | Location (city, state/province, country) | Role or Contribution, eg, chair, principal investigator | Group (if more than 1 Group listed in the byline) and/or Subgroup (eg, Steering Committee) |
|-----------------------------------|------------|-----------------------|------------------|-------------|------------------------------------------|---------------------------------------------------------|--------------------------------------------------------------------------------------------|
| Garrett                           | Miller     |                       | MS               |             |                                          |                                                         | Alzheimer's Disease Neuroimaging Initiative                                                |
| Tom                               | Montine    |                       | MD, PhD          |             |                                          |                                                         | Alzheimer's Disease Neuroimaging Initiative                                                |
| Shelley                           | Moore      |                       | BA               |             |                                          |                                                         | Alzheimer's Disease Neuroimaging Initiative                                                |
| John C.                           | Morris     |                       | MD               |             |                                          |                                                         | Alzheimer's Disease Neuroimaging Initiative                                                |
| Scott                             | Neu        |                       | PhD              |             |                                          |                                                         | Alzheimer's Disease Neuroimaging Initiative                                                |
| John                              | Neuhaus    |                       | PhD              |             |                                          |                                                         | Alzheimer's Disease Neuroimaging Initiative                                                |
| Kwangsik                          | Nho        |                       | PhD              |             |                                          |                                                         | Alzheimer's Disease Neuroimaging Initiative                                                |
| Talia M.                          | Nir        |                       | PhD              |             |                                          |                                                         | Alzheimer's Disease Neuroimaging Initiative                                                |
| Rachel                            | Nosheny    |                       | PhD              |             |                                          |                                                         | Alzheimer's Disease Neuroimaging Initiative                                                |
| Kelly                             | Nudelman   |                       | PhD              |             |                                          |                                                         | Alzheimer's Disease Neuroimaging Initiative                                                |

## Supplemental Online Content: Nonauthor Collaborators

\*First name, last name, and suffix (if applicable) are required and will appear in PubMed.

| *First Name and Middle Initial(s) | *Last Name | *Suffix (eg, Jr, III) | Academic Degrees | Institution | Location (city, state/province, country) | Role or Contribution, eg, chair, principal investigator | Group (if more than 1 Group listed in the byline) and/or Subgroup (eg, Steering Committee) |
|-----------------------------------|------------|-----------------------|------------------|-------------|------------------------------------------|---------------------------------------------------------|--------------------------------------------------------------------------------------------|
| Ozioma                            | Okonkwo    |                       | PhD              |             |                                          |                                                         | Alzheimer's Disease Neuroimaging Initiative                                                |
| Richard J.                        | Perrin     |                       | MD, PhD          |             |                                          |                                                         | Alzheimer's Disease Neuroimaging Initiative                                                |
| Ronald                            | Peterson   |                       | MD, PhD          |             |                                          |                                                         | Alzheimer's Disease Neuroimaging Initiative                                                |
| Jeremy                            | Pizzola    |                       | BA               |             |                                          |                                                         | Alzheimer's Disease Neuroimaging Initiative                                                |
| William                           | Potter     |                       | MD               |             |                                          |                                                         | Alzheimer's Disease Neuroimaging Initiative                                                |
| Michael                           | Rafii      |                       | MD, PhD          |             |                                          |                                                         | Alzheimer's Disease Neuroimaging Initiative                                                |
| Rema                              | Raman      |                       | PhD              |             |                                          |                                                         | Alzheimer's Disease Neuroimaging Initiative                                                |
| Robert                            | Reid       |                       | PhD              |             |                                          |                                                         | Alzheimer's Disease Neuroimaging Initiative                                                |
| Eric R.                           | Reiman     |                       | MD               |             |                                          |                                                         | Alzheimer's Disease Neuroimaging Initiative                                                |
| Shannon L.                        | Risacher   |                       | PhD              |             |                                          |                                                         | Alzheimer's Disease Neuroimaging Initiative                                                |

## Supplemental Online Content: Nonauthor Collaborators

\*First name, last name, and suffix (if applicable) are required and will appear in PubMed.

| *First Name and Middle Initial(s) | *Last Name | *Suffix (eg, Jr, III) | Academic Degrees | Institution | Location (city, state/province, country) | Role or Contribution, eg, chair, principal investigator | Group (if more than 1 Group listed in the byline) and/or Subgroup (eg, Steering Committee) |
|-----------------------------------|------------|-----------------------|------------------|-------------|------------------------------------------|---------------------------------------------------------|--------------------------------------------------------------------------------------------|
| Stephanie                         | Rossi Chen |                       | BA               |             |                                          |                                                         | Alzheimer's Disease Neuroimaging Initiative                                                |
| Laurie                            | Ryan       |                       | PhD              |             |                                          |                                                         | Alzheimer's Disease Neuroimaging Initiative                                                |
| Jennifer                          | Salazar    |                       | MBS              |             |                                          |                                                         | Alzheimer's Disease Neuroimaging Initiative                                                |
| Andrew J.                         | Saykin     |                       | PsyD             |             |                                          |                                                         | Alzheimer's Disease Neuroimaging Initiative                                                |
| Christopher                       | Schwarz    |                       | PhD              |             |                                          |                                                         | Alzheimer's Disease Neuroimaging Initiative                                                |
| Matthew                           | Senjem     |                       | MS               |             |                                          |                                                         | Alzheimer's Disease Neuroimaging Initiative                                                |
| Elizabeth                         | Shaffer    |                       | BS               |             |                                          |                                                         | Alzheimer's Disease Neuroimaging Initiative                                                |
| Leslie M.                         | Shaw       |                       | PhD              |             |                                          |                                                         | Alzheimer's Disease Neuroimaging Initiative                                                |
| Li                                | Shen       |                       | PhD              |             |                                          |                                                         | Alzheimer's Disease Neuroimaging Initiative                                                |
| Nina                              | Silverberg |                       | PhD              |             |                                          |                                                         | Alzheimer's Disease Neuroimaging Initiative                                                |

## Supplemental Online Content: Nonauthor Collaborators

\*First name, last name, and suffix (if applicable) are required and will appear in PubMed.

| <b>*First Name and Middle Initial(s)</b> | <b>*Last Name</b> | <b>*Suffix (eg, Jr, III)</b> | Academic Degrees | Institution | Location (city, state/province, country) | Role or Contribution, eg, chair, principal investigator | Group (if more than 1 Group listed in the byline) and/or Subgroup (eg, Steering Committee) |
|------------------------------------------|-------------------|------------------------------|------------------|-------------|------------------------------------------|---------------------------------------------------------|--------------------------------------------------------------------------------------------|
| Stephanie                                | Smith             |                              | BS               |             |                                          |                                                         | Alzheimer's Disease Neuroimaging Initiative                                                |
| Lisa                                     | Taylor-Reinwald   |                              | BA, HTL          |             |                                          |                                                         | Alzheimer's Disease Neuroimaging Initiative                                                |
| Leon                                     | Thal              |                              | MD               |             |                                          |                                                         | Alzheimer's Disease Neuroimaging Initiative                                                |
| Sophia I.                                | Thomopoulos       |                              | BS               |             |                                          |                                                         | Alzheimer's Disease Neuroimaging Initiative                                                |
| Paul                                     | Thompson          |                              | PhD              |             |                                          |                                                         | Alzheimer's Disease Neuroimaging Initiative                                                |
| Arthur W.                                | Toga              |                              | PhD              |             |                                          |                                                         | Alzheimer's Disease Neuroimaging Initiative                                                |
| Duygu                                    | Tosun-Turgut      |                              | PhD              |             |                                          |                                                         | Alzheimer's Disease Neuroimaging Initiative                                                |
| John Q.                                  | Trojanowski       |                              | MD, PhD          |             |                                          |                                                         | Alzheimer's Disease Neuroimaging Initiative                                                |
| Diana                                    | Truran Sacrey     |                              |                  |             |                                          |                                                         | Alzheimer's Disease Neuroimaging Initiative                                                |
| Dallas                                   | Veitch            |                              | PhD              |             |                                          |                                                         | Alzheimer's Disease Neuroimaging Initiative                                                |

Supplemental Online Content: Nonauthor Collaborators

\*First name, last name, and suffix (if applicable) are required and will appear in PubMed.

| <b>*First Name and Middle Initial(s)</b> | <b>*Last Name</b> | <b>*Suffix (eg, Jr, III)</b> | Academic Degrees | Institution | Location (city, state/province, country) | Role or Contribution, eg, chair, principal investigator | Group (if more than 1 Group listed in the byline) and/or Subgroup (eg, Steering Committee) |
|------------------------------------------|-------------------|------------------------------|------------------|-------------|------------------------------------------|---------------------------------------------------------|--------------------------------------------------------------------------------------------|
| Prashanthi                               | Vemuri            |                              | PhD              |             |                                          |                                                         | Alzheimer's Disease Neuroimaging Initiative                                                |
| Sarah                                    | Walter            |                              | MSc              |             |                                          |                                                         | Alzheimer's Disease Neuroimaging Initiative                                                |
| Chad                                     | Ward              |                              |                  |             |                                          |                                                         | Alzheimer's Disease Neuroimaging Initiative                                                |
| Michael W.                               | Weiner            |                              | MD               |             |                                          |                                                         | Alzheimer's Disease Neuroimaging Initiative                                                |
| Kristi                                   | Wilmes            |                              | MS, CCRP         |             |                                          |                                                         | Alzheimer's Disease Neuroimaging Initiative                                                |
| Paul A.                                  | Yushkevich        |                              | PhD              |             |                                          |                                                         | Alzheimer's Disease Neuroimaging Initiative                                                |
| Caileigh                                 | Zimmerman         |                              | MS               |             |                                          |                                                         | Alzheimer's Disease Neuroimaging Initiative                                                |
